# Supplementary material for: Preclinical Evidence for the Efficacy of Ischemic Postconditioning against Renal Ischemia-Reperfusion Injury, a Systematic Review and Meta-Analysis
Source: PubMed Central journal article supplement (PMC4786316; doi:10.1371/journal.pone.0150863), 2016-03-10
Supplement: pone.0150863.s002.pdf [file pone.0150863.s002.pdf]

**S1 Table | complete search strategy for Medline (via PubMed) and EMBASE**

|                                                                                                                                                                                                     |                  |                                                                                                                                                                                                                                                                                                                                                                                                                                                                                                                                                                                     |
|-----------------------------------------------------------------------------------------------------------------------------------------------------------------------------------------------------|------------------|-------------------------------------------------------------------------------------------------------------------------------------------------------------------------------------------------------------------------------------------------------------------------------------------------------------------------------------------------------------------------------------------------------------------------------------------------------------------------------------------------------------------------------------------------------------------------------------|
| <i>Medline<br/>(via PubMed)</i>                                                                                                                                                                     | Kidney           | "kidney"[MeSH Terms] OR "acute kidney injury"[MeSH Terms] OR "kidney transplantation"[MeSH Terms] OR "nephrology"[MeSH Terms] OR "kidney"[Tiab] OR "kidneys"[Tiab] OR "renal"[Tiab] OR "nephrology"[Tiab]                                                                                                                                                                                                                                                                                                                                                                           |
|                                                                                                                                                                                                     | Postconditioning | "ischemic postconditioning"[MeSH Terms] OR "postconditioning"[tiab] OR "post conditioning"[tiab] OR "post-conditioning"[tiab] OR "IPostC"[tiab] OR "RIPostC"[tiab] OR "IPOC"[tiab] OR "RIPOC"[tiab] OR "IPC"[tiab] OR "RIPC"[tiab] OR "postcon"[tiab] OR "brief ischemia"[tiab] OR "brief ischaemia"[tiab] OR "transient ischaemia"[tiab] OR "transient ischemia"[tiab] OR "intermittent ischaemia"[tiab] OR "intermittent ischemia"[tiab] OR "continuous ischemia"[tiab] OR "continuous ischaemia"[tiab] OR "IPost" [tiab] OR "RIPost" [tiab] OR "rPostC" [tiab] OR "PostC" [tiab] |
|                                                                                                                                                                                                     | Animals          | Laboratory animal search filter <sup>16</sup>                                                                                                                                                                                                                                                                                                                                                                                                                                                                                                                                       |
| <hr/> February 4 <sup>th</sup> 2015: 213 hits<br><i>NB: adding additional abbreviations of ischemic postconditioning "POC"[tiab] OR "IPO"[tiab] did not generate additional relevant hits</i> <hr/> |                  |                                                                                                                                                                                                                                                                                                                                                                                                                                                                                                                                                                                     |
| <i>EMBASE</i>                                                                                                                                                                                       | Kidney           | exp kidney/ or exp acute kidney failure/ or exp kidney transplantation/ or exp kidney allograft rejection/ or (renal or kidney or kidneys or nephrology).ti,ab.                                                                                                                                                                                                                                                                                                                                                                                                                     |
|                                                                                                                                                                                                     | Postconditioning | ischemic postconditioning/ or (brief ischemia or brief ischaemia or postconditioning or post conditioning or post-conditioning or transient ischaemia or transient ischemia or intermittent ischaemia or intermittent ischemia or continuous ischemia or continuous ischaemia or IPost or RIPost or IPOC or RIPOC or IPostC or RIPostC or IPC or RIPC or postcon or rPostC or PostC).ti,ab.                                                                                                                                                                                         |
|                                                                                                                                                                                                     | Animals          | Laboratory animal search filter <sup>17</sup>                                                                                                                                                                                                                                                                                                                                                                                                                                                                                                                                       |
| <hr/> February 4 <sup>th</sup> 2015: 272 hits                                                                                                                                                       |                  |                                                                                                                                                                                                                                                                                                                                                                                                                                                                                                                                                                                     |
