# Supplementary material for: Preclinical Evidence for the Efficacy of Ischemic Postconditioning against Renal Ischemia-Reperfusion Injury, a Systematic Review and Meta-Analysis
Source: PubMed Central journal article supplement (PMC4786316; doi:10.1371/journal.pone.0150863), 2016-03-10
Supplement: pone.0150863.s003.pdf [file pone.0150863.s003.pdf]

S2 Table | study quality and risk of bias assessment, individual scores

|                                      | Reporting         |                |                         |                                |                        | Risk of bias               |                                     |                                        |                                      |                                     |                              |                                 |                                  |                                    |              |
|--------------------------------------|-------------------|----------------|-------------------------|--------------------------------|------------------------|----------------------------|-------------------------------------|----------------------------------------|--------------------------------------|-------------------------------------|------------------------------|---------------------------------|----------------------------------|------------------------------------|--------------|
|                                      | Any randomization | Any blinding   | Sample size calculation | Conflict of interest statement | Temperature regulation | Overall (times Y out of 5) | Random group allocation (selection) | Groups similar at baseline (selection) | Blinded group allocation (selection) | Blinded interventions (performance) | Random housing (performance) | Random outcome ass. (detection) | Blinded outcome ass. (detection) | Reporting of drop-outs (attrition) | Other biases |
| Chen 2008 <sup>41</sup>              | Y                 | Y <sup>†</sup> | N                       | N                              | Y                      | 3                          | ?                                   | ?                                      | ?                                    | ?                                   | ?                            | ?                               | ?                                | ?                                  | ?            |
| Chen 2011 <sup>42</sup>              | Y                 | N              | N                       | N                              | N                      | 1                          | ?                                   | ?                                      | ?                                    | ?                                   | ?                            | ?                               | ?                                | ?                                  | ?            |
| Chen 2014 <sup>43</sup>              | Y                 | Y <sup>†</sup> | N                       | N                              | Y                      | 3                          | ?                                   | ?                                      | ?                                    | ?                                   | ?                            | ?                               | ?                                | ?                                  | ?            |
| Chen 2015 <sup>44</sup>              | Y                 | Y <sup>†</sup> | N                       | Y                              | Y                      | 4                          | ?                                   | ?                                      | ?                                    | ?                                   | ?                            | ?                               | ?                                | H                                  | L            |
| Eldaif 2010 <sup>45</sup>            | N                 | Y <sup>†</sup> | N                       | N                              | Y                      | 2                          | ?                                   | ?                                      | ?                                    | ?                                   | ?                            | ?                               | ?                                | H                                  | ?            |
| Fan 2009 <sup>46</sup>               | Y                 | N              | N                       | N                              | N                      | 1                          | ?                                   | ?                                      | ?                                    | ?                                   | ?                            | ?                               | ?                                | L                                  | ?            |
| Guo 2014 <sup>47</sup>               | N                 | N              | N                       | N                              | N                      | 0                          | ?                                   | ?                                      | ?                                    | ?                                   | ?                            | ?                               | ?                                | ?                                  | ?            |
| Ji 2012 <sup>48</sup>                | Y                 | N              | N                       | N                              | Y                      | 2                          | ?                                   | ?                                      | ?                                    | ?                                   | ?                            | ?                               | ?                                | L                                  | ?            |
| Jiang 2010 <sup>49</sup>             | Y                 | Y <sup>†</sup> | N                       | N                              | Y                      | 3                          | ?                                   | ?                                      | ?                                    | ?                                   | ?                            | ?                               | ?                                | L                                  | ?            |
| Jiang 2014 <sup>50</sup>             | Y                 | N              | N                       | Y                              | N                      | 2                          | ?                                   | ?                                      | ?                                    | ?                                   | ?                            | ?                               | ?                                | L                                  | L            |
| Kadkhodae 2011 <sup>22</sup>         | Y                 | N              | N                       | Y                              | N                      | 2                          | ?                                   | ?                                      | ?                                    | ?                                   | ?                            | ?                               | ?                                | ?                                  | L            |
| Kadkhodae 2014 <sup>51</sup>         | Y                 | N              | N                       | Y                              | Y                      | 3                          | ?                                   | ?                                      | ?                                    | ?                                   | ?                            | ?                               | ?                                | ?                                  | L            |
| Lemoine 2015 <sup>52</sup>           | N                 | Y <sup>†</sup> | N                       | Y                              | Y                      | 3                          | ?                                   | ?                                      | ?                                    | ?                                   | ?                            | ?                               | ?                                | ?                                  | L            |
| Li 2010 <sup>53</sup>                | Y                 | N              | N                       | N                              | Y                      | 2                          | ?                                   | ?                                      | ?                                    | ?                                   | ?                            | ?                               | ?                                | ?                                  | ?            |
| Li 2012 <sup>54</sup>                | Y                 | N              | N                       | N                              | N                      | 1                          | ?                                   | ?                                      | ?                                    | ?                                   | ?                            | ?                               | ?                                | L                                  | ?            |
| Liu 2007 <sup>55</sup>               | N                 | Y <sup>†</sup> | N                       | N                              | Y                      | 2                          | ?                                   | ?                                      | ?                                    | ?                                   | ?                            | ?                               | ?                                | ?                                  | ?            |
| Mahfoudh-Boussaid 2012 <sup>24</sup> | Y                 | Y <sup>†</sup> | N                       | Y                              | Y                      | 4                          | ?                                   | ?                                      | ?                                    | ?                                   | ?                            | ?                               | ?                                | L                                  | L            |
| Mahmoudi 2014 <sup>35</sup>          | Y                 | N              | N                       | N                              | N                      | 1                          | ?                                   | ?                                      | ?                                    | ?                                   | ?                            | ?                               | ?                                | ?                                  | ?            |
| Miklós 2012 <sup>26</sup>            | N                 | Y <sup>†</sup> | N                       | N                              | N                      | 1                          | ?                                   | L                                      | ?                                    | ?                                   | ?                            | ?                               | ?                                | ?                                  | ?            |
| Serviddio 2008 <sup>27</sup>         | N                 | Y <sup>†</sup> | N                       | Y                              | N                      | 2                          | ?                                   | L                                      | ?                                    | ?                                   | ?                            | ?                               | ?                                | ?                                  | L            |
| Shokeir 2012 <sup>56</sup>           | Y                 | N              | N                       | Y                              | N                      | 2                          | ?                                   | L                                      | ?                                    | ?                                   | ?                            | ?                               | ?                                | ?                                  | L            |
| Shokeir 2014 <sup>57</sup>           | Y                 | N              | N                       | Y                              | N                      | 2                          | ?                                   | L                                      | ?                                    | ?                                   | ?                            | ?                               | ?                                | L                                  | L            |
| Szwarc 2007 <sup>58</sup>            | N                 | N              | N                       | N                              | Y                      | 1                          | ?                                   | L                                      | ?                                    | ?                                   | ?                            | ?                               | ?                                | L                                  | ?            |
| Tan 2013 <sup>59</sup>               | N                 | N              | N                       | Y                              | Y                      | 2                          | ?                                   | ?                                      | ?                                    | ?                                   | ?                            | ?                               | ?                                | ?                                  | L            |
| Tang 2008 <sup>60</sup>              | Y                 | N              | N                       | N                              | N                      | 1                          | ?                                   | ?                                      | ?                                    | ?                                   | ?                            | ?                               | ?                                | L                                  | ?            |
| Tao 2012 <sup>61</sup>               | Y                 | N              | N                       | Y                              | N                      | 2                          | L                                   | L                                      | ?                                    | ?                                   | ?                            | ?                               | ?                                | L                                  | L            |
| Wang 2010 <sup>62</sup>              | Y                 | Y <sup>†</sup> | N                       | N                              | Y                      | 3                          | ?                                   | ?                                      | ?                                    | ?                                   | ?                            | ?                               | ?                                | ?                                  | ?            |
| Weng 2012 <sup>28</sup>              | Y                 | Y <sup>†</sup> | N                       | Y                              | Y                      | 4                          | ?                                   | ?                                      | ?                                    | ?                                   | ?                            | ?                               | ?                                | L                                  | L            |
| Wever 2012 <sup>23</sup>             | Y                 | Y <sup>†</sup> | N                       | Y                              | N                      | 3                          | ?                                   | ?                                      | ?                                    | ?                                   | ?                            | ?                               | ?                                | L                                  | L            |
| Xia 2014 <sup>25</sup>               | Y                 | N              | N                       | Y                              | N                      | 2                          | ?                                   | ?                                      | ?                                    | ?                                   | ?                            | ?                               | ?                                | L                                  | L            |
| Yun 2009 A <sup>63</sup>             | Y                 | Y <sup>†</sup> | N                       | N                              | Y                      | 3                          | ?                                   | ?                                      | ?                                    | ?                                   | ?                            | ?                               | ?                                | L                                  | ?            |
| Yun 2009 B <sup>64</sup>             | Y                 | Y <sup>†</sup> | N                       | N                              | Y                      | 3                          | ?                                   | ?                                      | ?                                    | ?                                   | ?                            | ?                               | ?                                | ?                                  | ?            |
| Zhang 2011 <sup>65</sup>             | Y                 | N              | N                       | N                              | N                      | 1                          | ?                                   | ?                                      | ?                                    | ?                                   | ?                            | ?                               | ?                                | L                                  | ?            |
| Zhu 2008 <sup>66</sup>               | Y                 | N              | N                       | N                              | N                      | 1                          | ?                                   | ?                                      | ?                                    | ?                                   | ?                            | ?                               | ?                                | L                                  | ?            |
| Zhuang 2009 <sup>67</sup>            | N                 | Y <sup>†</sup> | N                       | N                              | N                      | 1                          | ?                                   | ?                                      | ?                                    | ?                                   | ?                            | ?                               | ?                                | ?                                  | ?            |
| Total Y/L                            | 26                | 16             | 0                       | 14                             | 17                     |                            | 1                                   | 6                                      | 0                                    | 0                                   | 0                            | 0                               | 0                                | 16                                 | 14           |

Y = yes, N = no, ? = unclear risk of bias, H = high risk of bias, L = low risk of bias; <sup>†</sup> Only blinded for histology; # groups were similar only for sex
