# Supplementary material for: Preclinical Evidence for the Efficacy of Ischemic Postconditioning against Renal Ischemia-Reperfusion Injury, a Systematic Review and Meta-Analysis
Source: PubMed Central journal article supplement (PMC4786316; doi:10.1371/journal.pone.0150863), 2016-03-10
Supplement: pone.0150863.s004.pdf [file pone.0150863.s004.pdf]

**S3 Table | Subgroup analysis serum creatinine local IPoC**

|                               | # pub | # comp | NMD  | [95%CI]       |
|-------------------------------|-------|--------|------|---------------|
| all ( $T^2$ 539, $I^2$ 74.7%) | 29    | 34     | 45.0 | [33.4, 56.6]  |
| species                       |       |        |      |               |
| P=0.14, adj. $R^2$ 12.8%      |       |        |      |               |
| dog                           | 1     | 3      | 79.3 | [29.0, 129.6] |
| mouse                         | 3     | 4      | 19.5 | [-13.1, 52.0] |
| rat                           | 25    | 27     | 47.2 | [33.8, 60.5]  |
| sex                           |       |        |      |               |
| P=0.21, adj. $R^2$ 10.4%      |       |        |      |               |
| female                        | 3     | 3      | 20.9 | [-18.3, 60.2] |
| male                          | 27    | 31     | 47.8 | [35.1, 60.6]  |
| # cycles                      |       |        |      |               |
| P=0.26, adj. $R^2$ 8.8%       |       |        |      |               |
| 3 cycles                      | 10    | 11     | 39.6 | [21.3, 58.0]  |
| 4 cycles                      | 4     | 5      | 28.3 | [-5.8, 62.4]  |
| 6 cycles                      | 14    | 16     | 51.3 | [31.4, 71.3]  |
| 10 cycles                     | 2     | 2      | 86.2 | [36.4, 136.0] |
| IPoC ischemia                 |       |        |      |               |
| P=0.12, adj. $R^2$ 8.7%       |       |        |      |               |
| 26-125 sec                    | 23    | 26     | 41.8 | [27.5, 56.1]  |
| 126-630 sec                   | 4     | 5      | 82.0 | [45.4, 118.5] |
| 631-3162 sec                  | 3     | 3      | 35.9 | [5.6, 66.3]   |
| index ischemia                |       |        |      |               |
| P=0.15, adj. $R^2$ 7.7%       |       |        |      |               |
| 16-30 min                     | 4     | 5      | 20.2 | [-10.7, 51.1] |
| 31-45 min                     | 20    | 22     | 43.7 | [28.2, 59.1]  |
| 46-60 min                     | 4     | 6      | 72.3 | [41.5, 103.1] |
| 76-90 min                     | 1     | 1      | 58.3 | [7.5, 109.1]  |
| delay (linear)                |       |        |      |               |
| P=0.20, adj. $R^2$ 6.4%       |       |        |      |               |
|                               | 30    | 34     |      |               |

Total # comparisons = 6, corrected  $P < 0.009$ ; IPoC = ischemic postconditioning, pub = publications, comp = comparisons, NMD = normalized mean difference, adj. = adjusted. Protocol ischemia; amount of total ischemia time within IPoC protocol, delay; amount of delay between index ischemia and start IPoC protocol.
