# Supplementary material for: Preclinical Evidence for the Efficacy of Ischemic Postconditioning against Renal Ischemia-Reperfusion Injury, a Systematic Review and Meta-Analysis
Source: PubMed Central journal article supplement (PMC4786316; doi:10.1371/journal.pone.0150863), 2016-03-10
Supplement: pone.0150863.s005.pdf [file pone.0150863.s005.pdf]

**S4 Table | Subgroup analysis blood urea nitrogen local IPoC**

|                                                                                                                                                                                                                                                                                                                             | # pub | # comp | NMD  | [95%CI]       |
|-----------------------------------------------------------------------------------------------------------------------------------------------------------------------------------------------------------------------------------------------------------------------------------------------------------------------------|-------|--------|------|---------------|
| all ( $T^2$ 703, $I^2$ 71.6%)                                                                                                                                                                                                                                                                                               | 28    | 33     | 43.4 | [30.8, 56.1]  |
| species                                                                                                                                                                                                                                                                                                                     |       |        |      |               |
| <i>not analyzed</i>                                                                                                                                                                                                                                                                                                         |       |        |      |               |
| dog                                                                                                                                                                                                                                                                                                                         | 1     | 3      | 74.4 | [9.6, 139.3]  |
| mouse                                                                                                                                                                                                                                                                                                                       | 2     | 3      | 4.2  | [-22.7, 31.0] |
| rat                                                                                                                                                                                                                                                                                                                         | 25    | 27     | 48.3 | [36.5, 60.0]  |
| sex                                                                                                                                                                                                                                                                                                                         |       |        |      |               |
| <i>not analyzed</i>                                                                                                                                                                                                                                                                                                         |       |        |      |               |
| female                                                                                                                                                                                                                                                                                                                      | 2     | 2      | 30.6 | [-15.3, 76.6] |
| male                                                                                                                                                                                                                                                                                                                        | 27    | 31     | 44.0 | [31.5, 56.5]  |
| cycles                                                                                                                                                                                                                                                                                                                      |       |        |      |               |
| P=0.05, adj. $R^2$ 31.9%                                                                                                                                                                                                                                                                                                    |       |        |      |               |
| 3 cycles                                                                                                                                                                                                                                                                                                                    | 8     | 9      | 28.1 | [12.0, 44.2]  |
| 4 cycles                                                                                                                                                                                                                                                                                                                    | 4     | 5      | 29.5 | [-2.4, 61.5]  |
| 6 cycles                                                                                                                                                                                                                                                                                                                    | 15    | 17     | 56.2 | [39.1, 73.4]  |
| 10 cycles                                                                                                                                                                                                                                                                                                                   | 2     | 2      | 81.9 | [35.4, 128.3] |
| protocol ischemia                                                                                                                                                                                                                                                                                                           |       |        |      |               |
| P=0.12, adj. $R^2$ 8.5%                                                                                                                                                                                                                                                                                                     |       |        |      |               |
| 26-125 sec                                                                                                                                                                                                                                                                                                                  | 22    | 25     | 42.6 | [29.0, 56.2]  |
| 126-630 sec                                                                                                                                                                                                                                                                                                                 | 4     | 5      | 78.2 | [39.1, 117.2] |
| 631-3162 sec                                                                                                                                                                                                                                                                                                                | 3     | 3      | 25.2 | [-3.2, 53.7]  |
| index ischemia                                                                                                                                                                                                                                                                                                              |       |        |      |               |
| P=0.007, adj. $R^2$ 44.5%                                                                                                                                                                                                                                                                                                   |       |        |      |               |
| 16-30 min                                                                                                                                                                                                                                                                                                                   | 3     | 4      | 6.2  | [-17.4, 29.9] |
| 31-45 min                                                                                                                                                                                                                                                                                                                   | 19    | 21     | 43.1 | [29.8, 56.4]  |
| 46-60 min                                                                                                                                                                                                                                                                                                                   | 5     | 7      | 73.2 | [48.5, 97.9]  |
| 76-90 min                                                                                                                                                                                                                                                                                                                   | 1     | 1      | 47.1 | [8.8, 85.5]   |
| delay (linear)                                                                                                                                                                                                                                                                                                              |       |        |      |               |
| P=0.05, adj. $R^2$ 14.4%                                                                                                                                                                                                                                                                                                    |       |        |      |               |
| Total # comparisons = 4, corrected $P < 0.012$ ; IPoC = ischemic postconditioning, pub = publications, comp = comparisons, NMD = normalized mean difference, adj. = adjusted. Protocol ischemia; amount of total ischemia time within IPoC protocol, delay; amount of delay between index ischemia and start IPoC protocol. |       |        |      |               |
