# Supplementary material for: Preclinical Evidence for the Efficacy of Ischemic Postconditioning against Renal Ischemia-Reperfusion Injury, a Systematic Review and Meta-Analysis
Source: PubMed Central journal article supplement (PMC4786316; doi:10.1371/journal.pone.0150863), 2016-03-10
Supplement: pone.0150863.s006.pdf [file pone.0150863.s006.pdf]

**S5 Table |Subgroup analysis renal histology local IPoC**

|                               | # pub | # comp | MD   | [95%CI]       |
|-------------------------------|-------|--------|------|---------------|
| all ( $T^2$ 369, $I^2$ 96.2%) | 18    | 23     | 27.8 | [18.4, 37.2]  |
| species                       |       |        |      |               |
| <i>not analyzed</i>           |       |        |      |               |
| dog                           | 1     | 3      | 59.7 | [31.7, 87.6]  |
| mouse                         | 2     | 3      | 17.3 | [-1.5, 36.1]  |
| rat                           | 15    | 17     | 26.2 | [17.3, 35.1]  |
| sex                           |       |        |      |               |
| <i>not analyzed</i>           |       |        |      |               |
| female                        | 1     | 1      | 3.6  | [-29.1, 36.3] |
| male                          | 18    | 22     | 28.8 | [20.6, 37.0]  |
| cycles                        |       |        |      |               |
| P=0.84, adj. $R^2$ -17.0%     |       |        |      |               |
| 3 cycles                      | 4     | 5      | 23.4 | [5.5, 41.3]   |
| 4 cycles                      | 2     | 3      | 22.2 | [-1.0, 45.3]  |
| 6 cycles                      | 12    | 14     | 29.5 | [18.1, 40.9]  |
| 10 cycles                     | 1     | 1      | 37.5 | [2.7, 72.3]   |
| protocol ischemia             |       |        |      |               |
| P=0.63, adj. $R^2$ -5.7%      |       |        |      |               |
| 26-125 sec                    | 15    | 18     | 25.5 | [16.2, 34.7]  |
| 126-630 sec                   | 3     | 4      | 36.1 | [14.7, 57.4]  |
| 631-3162 sec                  | 1     | 1      | 35.0 | [-5.6, 75.5]  |
| index ischemia                |       |        |      |               |
| P=0.13, adj. $R^2$ 3.3%       |       |        |      |               |
| 16-30 min                     | 3     | 4      | 15.5 | [-1.6, 32.6]  |
| 31-45 min                     | 11    | 13     | 25.9 | [14.6, 37.1]  |
| 46-60 min                     | 4     | 6      | 39.9 | [24.4, 55.3]  |
| delay (linear)                |       |        |      |               |
| P=0.22, adj. $R^2$ 2.45%      |       |        |      |               |

Total # comparisons = 4, corrected  $P < 0.012$ ; IPoC = ischemic postconditioning, pub = publications, comp = comparisons, MD = mean difference, adj. = adjusted. Protocol ischemia; amount of total ischemia time within IPoC protocol, delay; amount of delay between index ischemia and start IPoC protocol.
